# Supplementary material
Source: PubMed Central journal article supplement (PMC5294711)
Supplement: mmc1.pdf [file mmc1.pdf]

**The American Journal of Human Genetics, Volume 100**

**Supplemental Data**

**The Rare-Variant Generalized Disequilibrium Test for  
Association Analysis of Nuclear and Extended Pedigrees  
with Application to Alzheimer Disease WGS Data**

**Zongxiao He, Di Zhang, Alan E. Renton, Biao Li, Linhai Zhao, Gao T. Wang, Alison M. Goate, Richard Mayeux, and Suzanne M. Leal**

## Supplemental Acknowledgements

The Alzheimer's Disease Sequencing Project (ADSP) is comprised of two Alzheimer's Disease (AD) genetics consortia and three National Human Genome Research Institute (NHGRI) funded Large Scale Sequencing and Analysis Centers (LSAC). The two AD genetics consortia are the Alzheimer's Disease Genetics Consortium (ADGC) funded by NIA (U01 AG032984), and the Cohorts for Heart and Aging Research in Genomic Epidemiology (CHARGE) funded by NIA (R01 AG033193), the National Heart, Lung, and Blood Institute (NHLBI), other National Institute of Health (NIH) institutes and other foreign governmental and non-governmental organizations. The Discovery Phase analysis of sequence data is supported through UF1AG047133 (to Drs. Schellenberg, Farrer, Pericak-Vance, Mayeux, and Haines); RF1AG015473 to Dr. Mayeux; U01AG049505 to Dr. Seshadri; U01AG049506 to Dr. Boerwinkle; U01AG049507 to Dr. Wijsman; and U01AG049508 to Dr. Goate.

The ADGC cohorts include: Adult Changes in Thought (ACT), the Alzheimer's Disease Centers (ADC), the Chicago Health and Aging Project (CHAP), the Memory and Aging Project (MAP), Mayo Clinic (MAYO), Mayo Parkinson's Disease controls, University of Miami, the Multi-Institutional Research in Alzheimer's Genetic Epidemiology Study (MIRAGE), the National Cell Repository for Alzheimer's Disease (NCRAD), the National Institute on Aging Late Onset Alzheimer's Disease Family Study (NIA-LOAD), the Religious Orders Study (ROS), the Texas Alzheimer's Research and Care Consortium (TARC), Vanderbilt University/Case Western Reserve University (VAN/CWRU), the Washington Heights-Inwood Columbia Aging Project (WHICAP) and the Washington University Sequencing Project (WUSP), the Columbia University Hispanic- Estudio Familiar de Influencia Genetica de Alzheimer (EFIGA), the University of Toronto (UT), and Genetic Differences (GD).

The CHARGE cohorts, with funding provided by 5RC2HL102419 and HL105756, include the following: Atherosclerosis Risk in Communities (ARIC) Study which is carried out as a collaborative study supported by NHLBI contracts (HHSN268201100005C, HHSN268201100006C, HHSN268201100007C, HHSN268201100008C, HHSN268201100009C, HHSN268201100010C, HHSN268201100011C, and HHSN268201100012C), Austrian Stroke Prevention Study (ASPS), Cardiovascular Health Study (CHS), Erasmus Rucphen Family Study (ERF), Framingham Heart Study (FHS), and Rotterdam Study (RS).

The three LSACs are: the Human Genome Sequencing Center at the Baylor College of Medicine (U54 HG003273), the Broad Institute Genome Center (U54HG003067), and the Washington University Genome Institute (U54HG003079).

Biological samples and associated phenotypic data used in primary data analyses were stored at Study Investigators institutions, and at the National Cell Repository for Alzheimer's Disease (NCRAD, U24AG021886) at Indiana University funded by NIA. Associated Phenotypic Data used

in primary and secondary data analyses were provided by Study Investigators, the NIA funded Alzheimer's Disease Centers (ADCs), and the National Alzheimer's Coordinating Center (NACC, U01AG016976) and the National Institute on Aging Genetics of Alzheimer's Disease Data Storage Site (NIAGADS, U24AG041689) at the University of Pennsylvania, funded by NIA, and at the Database for Genotypes and Phenotypes (dbGaP) funded by NIH. Contributors to the Genetic Analysis Data included Study Investigators on projects that were individually funded by NIA, and other NIH institutes, and by private U.S. organizations, or foreign governmental or nongovernmental organizations.

## Supplemental Figures and Tables

**Figure S1. QQ plot of the  $-\log_{10}$  p-values for data simulated under the null hypothesis of no association.**

P-values for the RV-GDT were obtained empirically using 100,000 permutations. Confidence intervals are highlighted in gray. Four different types of family data were investigated: 1,000 discordant sib-pairs (Figure 1 pedigree structure A), 1,000 affected sib-pairs (Figure 1 pedigree structure B), 1,000 extended pedigrees (Figure 1 pedigree structure C), and mixed family types including 500 discordant sib-pairs, 250 affected sib-pairs and 250 extended pedigrees. Panel A: genotypes simulated using ExAC Non-Finnish European variant information; Panel B: genotypes simulated using ExAC Non-Finnish European variant information with ~50% of the founders missing their genotype data. Panel C: genotypes were simulated for an admixed population (20% Non-Finnish Europeans and 80% African/African American); Panel D: genotypes were simulated for a population with substructure (50% Non-Finnish European families and 50% African/African American families).

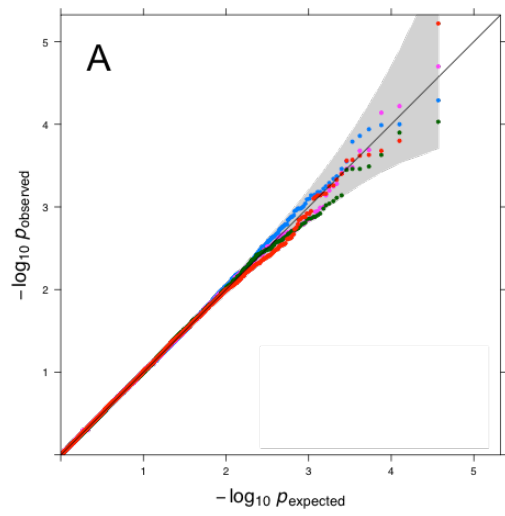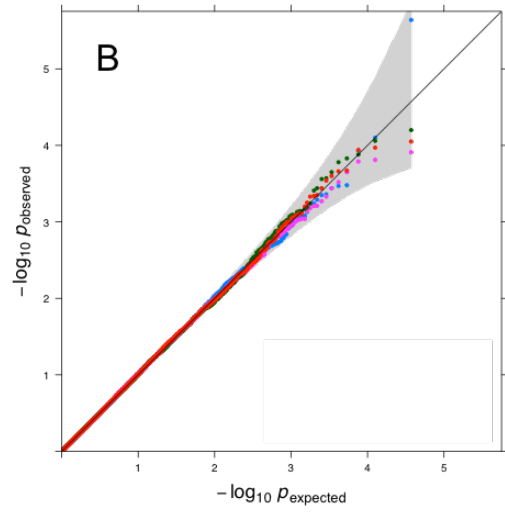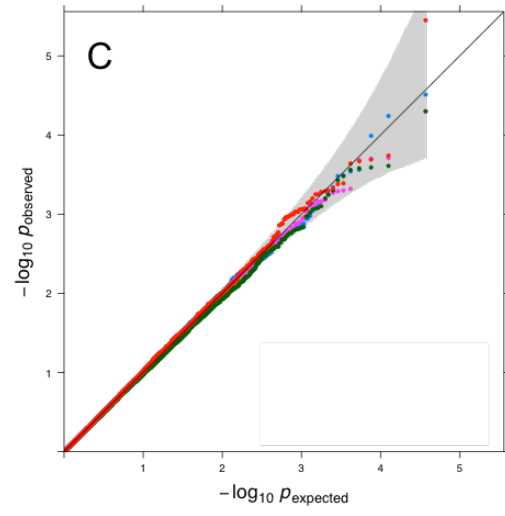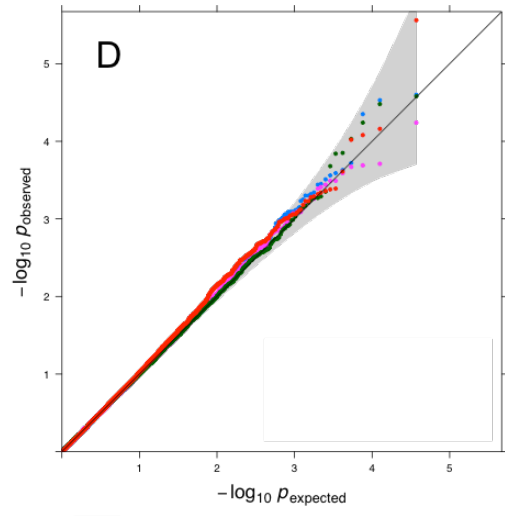

Discordant Sib-pairs  
Affected Sib-pairs

●

Extended Pedigrees  
Mixed Family Types

●

●

●

**Figure S2. Eighty-one Alzheimer's disease pedigrees included in the analysis from Alzheimer's Disease Sequencing Project.**

The dataset includes 338 individuals with Alzheimer's disease of which 316 have whole genome sequence data and 494 unaffected individuals of which 98 have whole genome sequence data. Filled squares and circles represent males and females with Alzheimer's disease, respectively, while family members with open squares and circles represent unaffected individuals. Individuals represented in red have whole genome sequence data available, while those in black do not have genotype data. There are 25 families that cannot be analyzed by the FBAT software, and these families are marked with asterisks (\*).

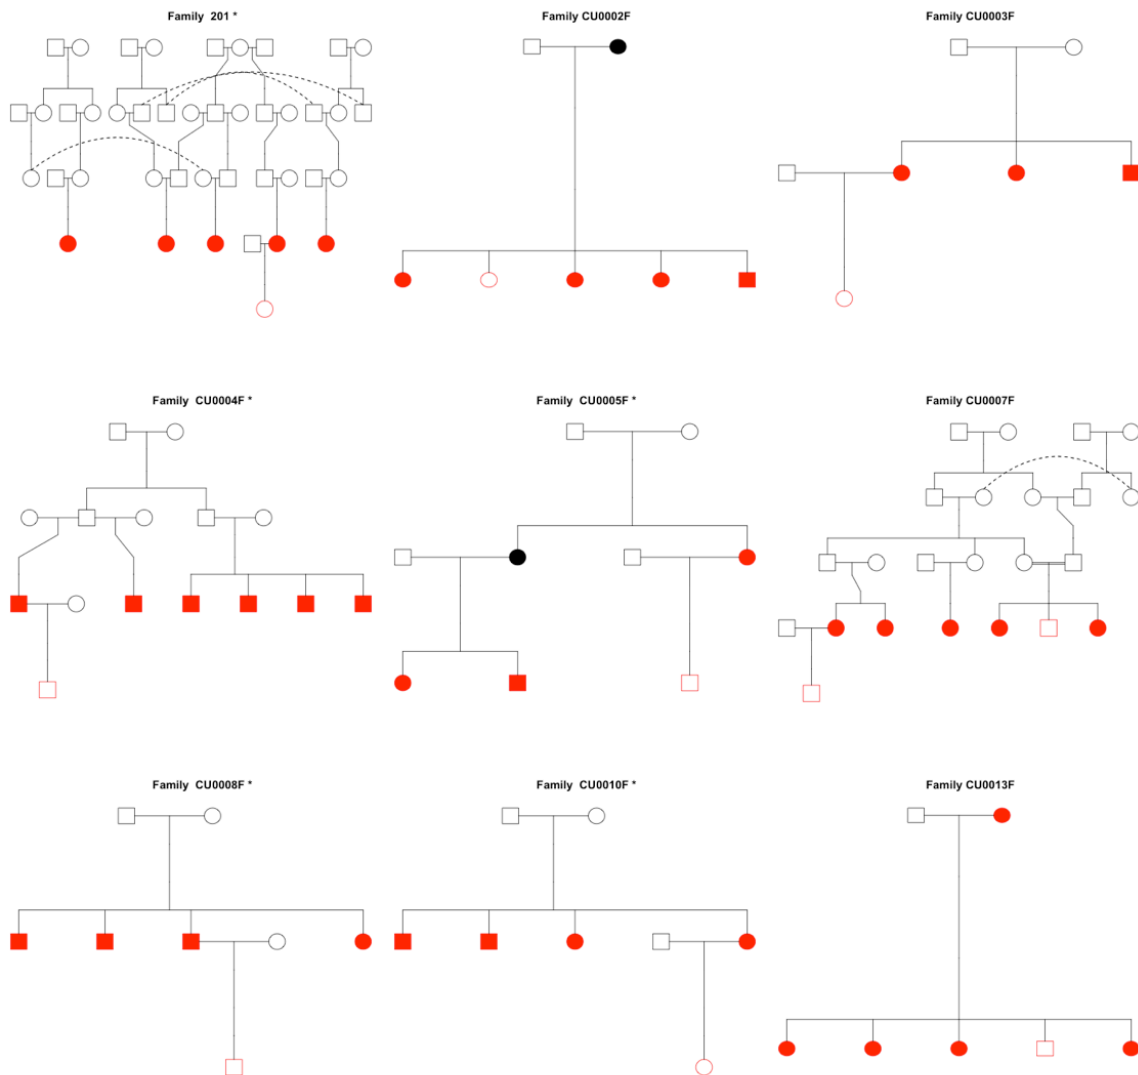

Family CU0014F

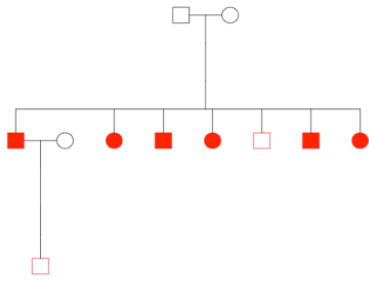

Family CU0015F

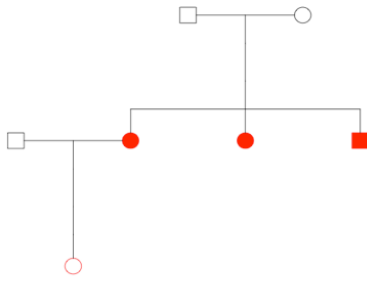

Family CU0016F

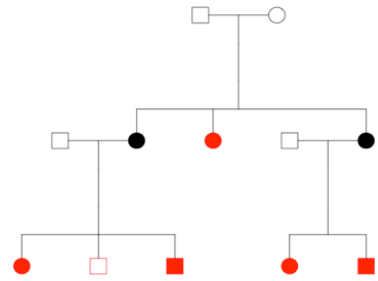

Family CU0017F \*

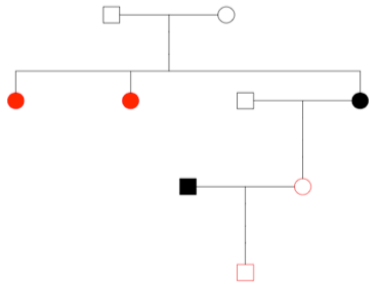

Family CU0021F

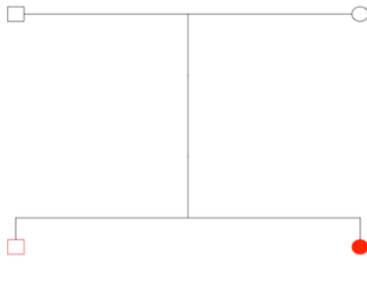

Family CU0023F

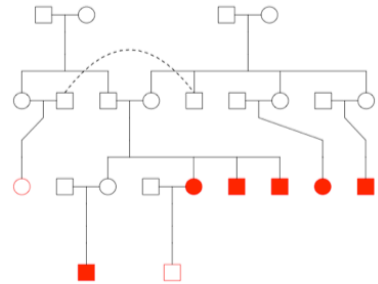

Family CU0026F

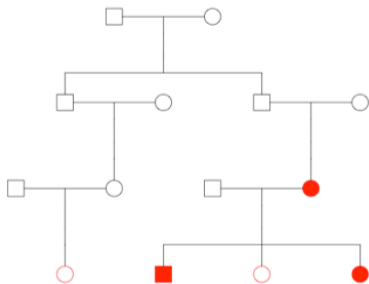

Family CU0029F \*

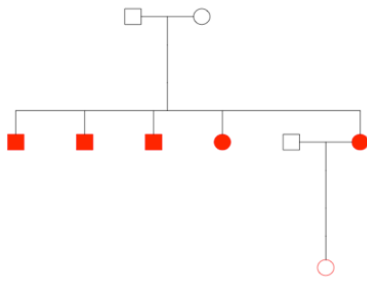

Family CU0030F

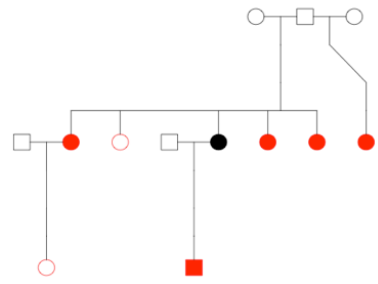

Family CU0031F

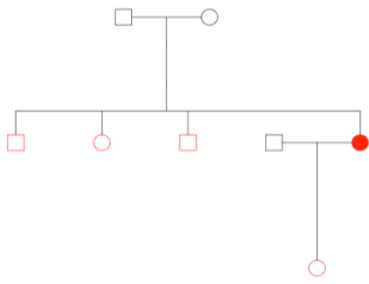

Family CU0032F

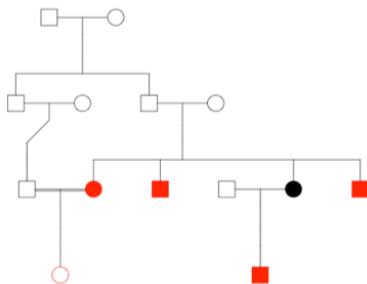

Family CU0033F

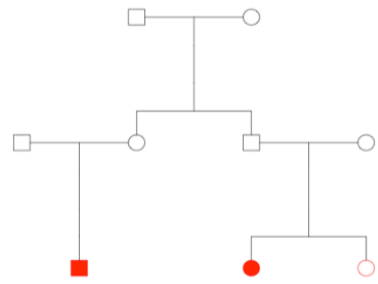

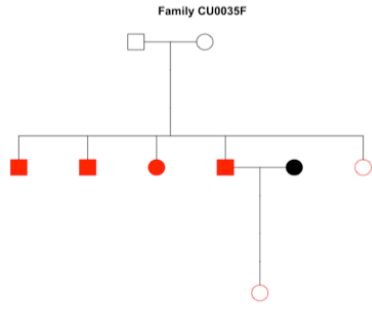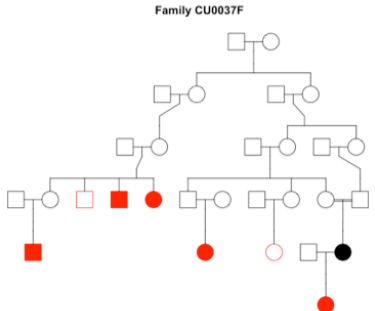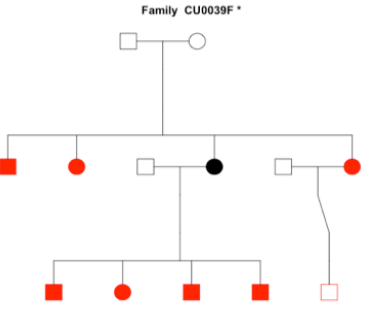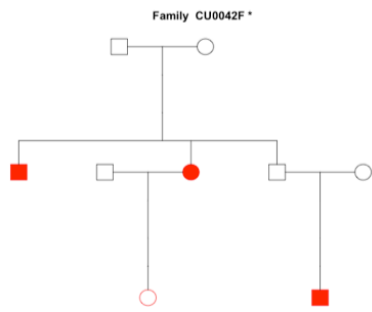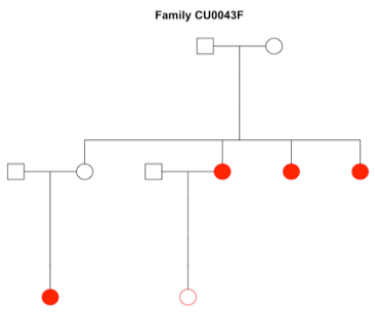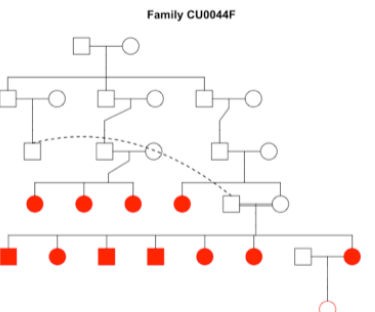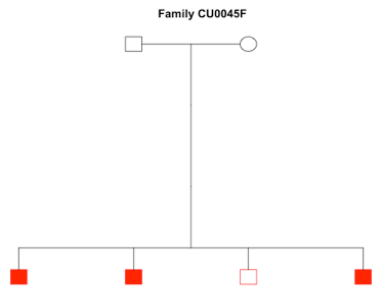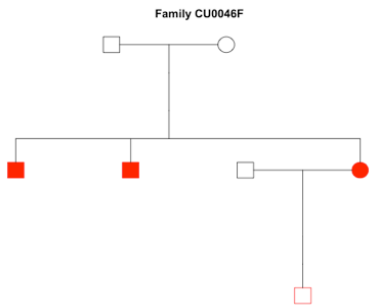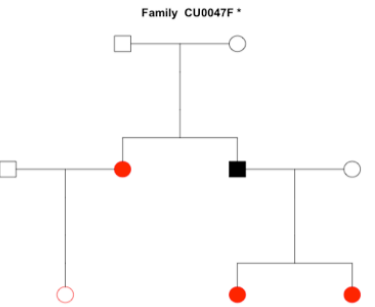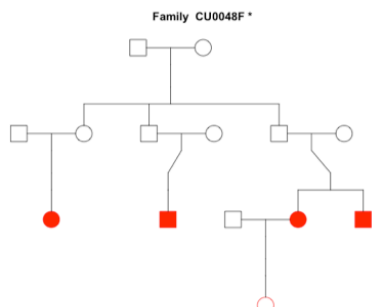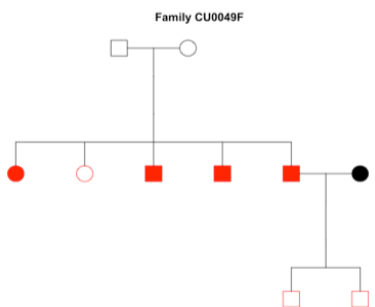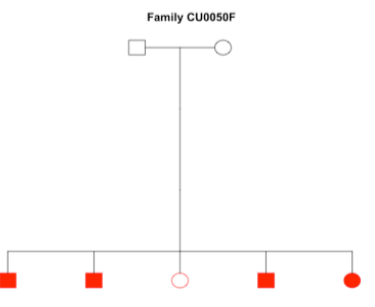



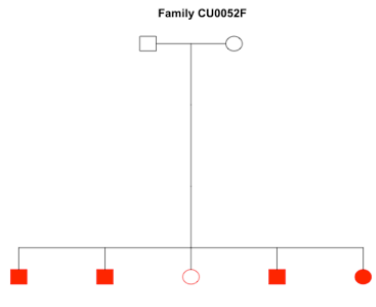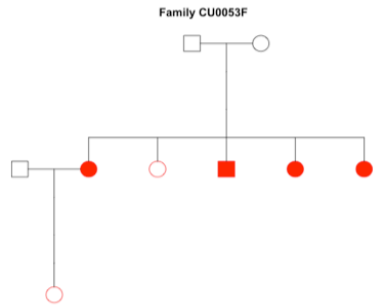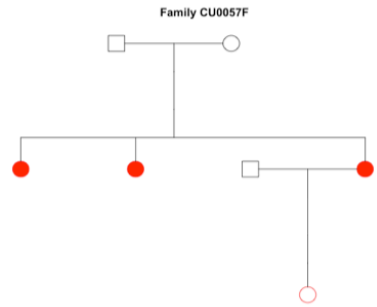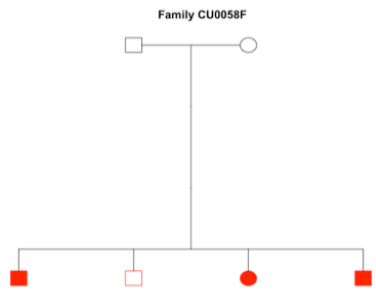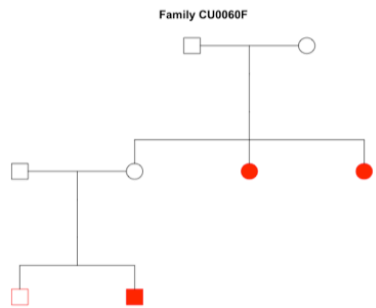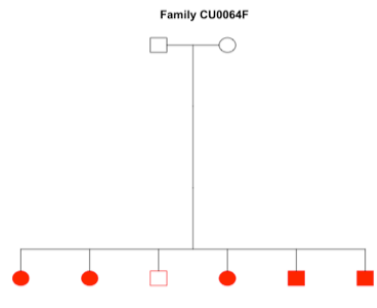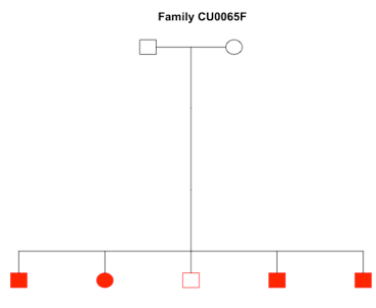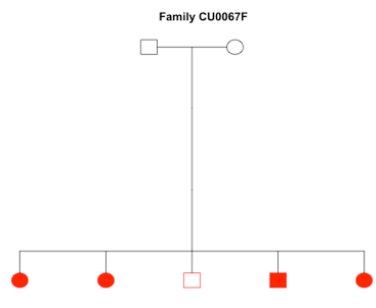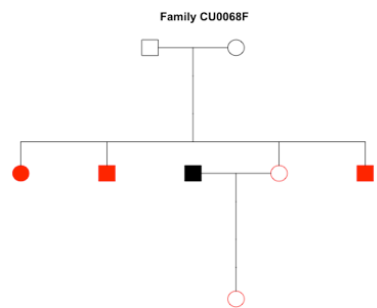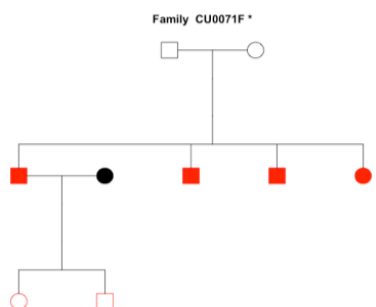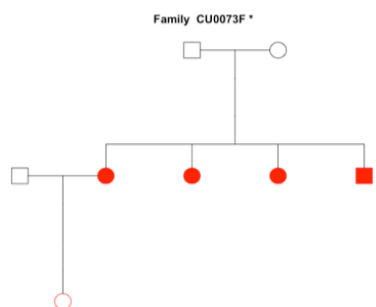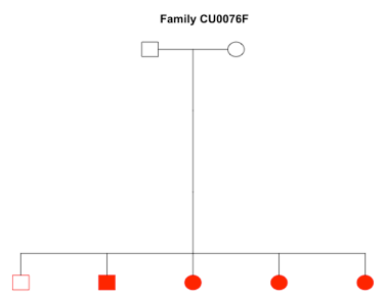

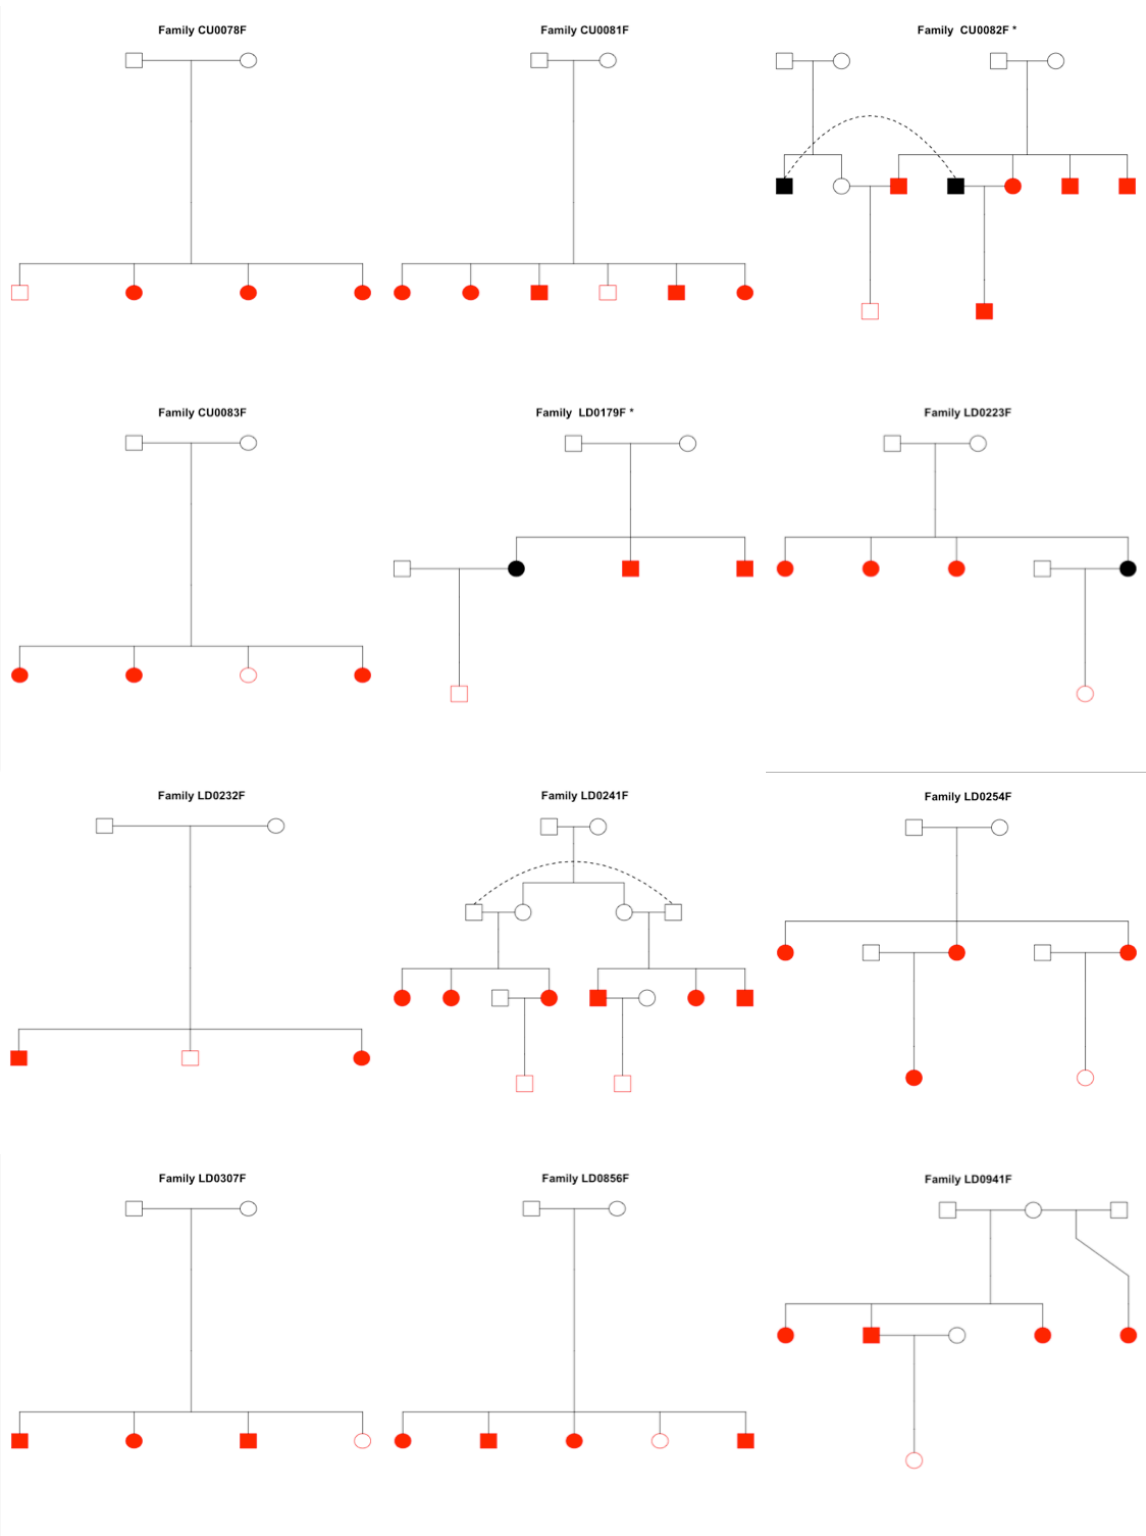

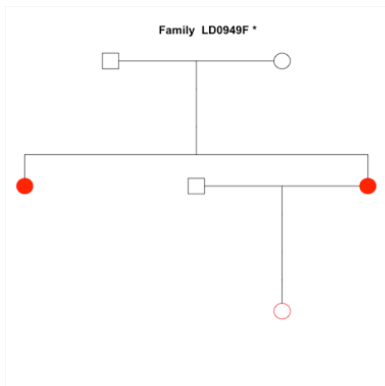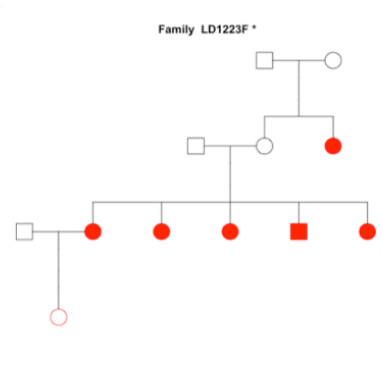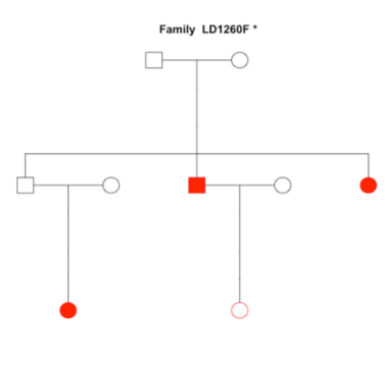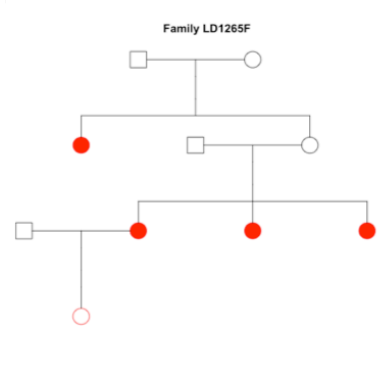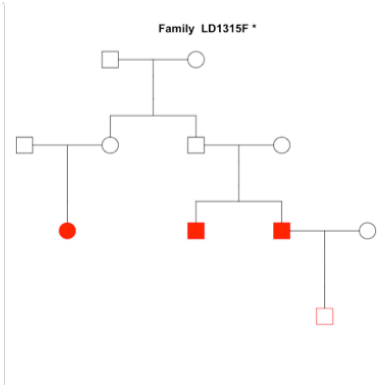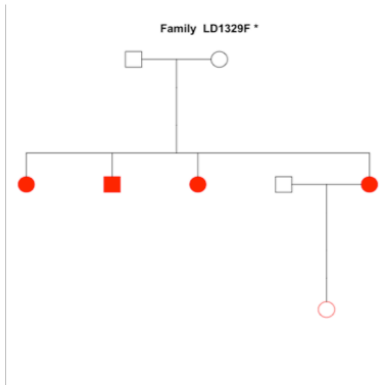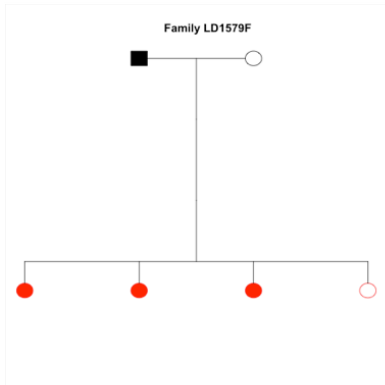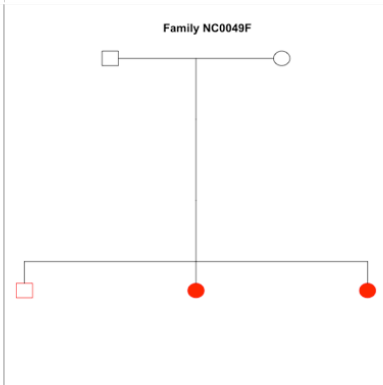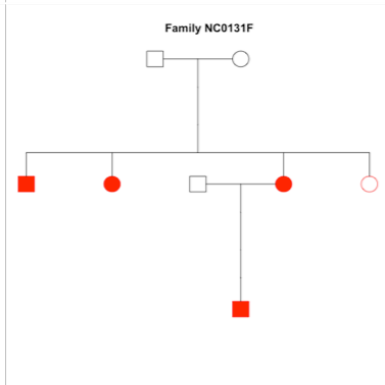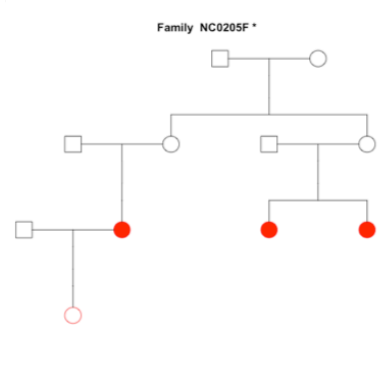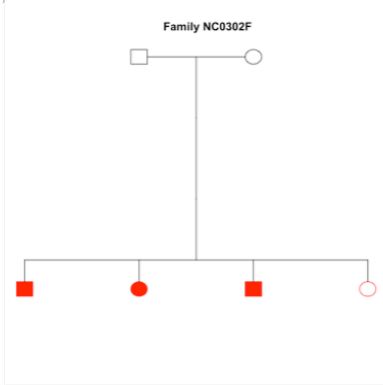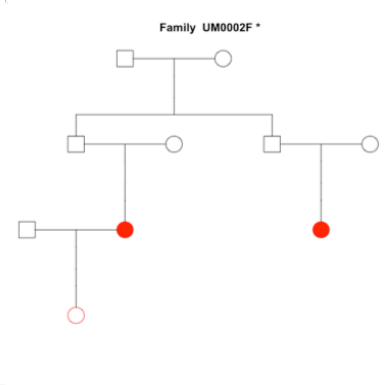



**Table S1. Type I error rate for RareIBD at  $\alpha$  levels of 0.05**

|                                                                                       | <b>Discordant Sib-pair</b> | <b>Affected Sib-pair</b> | <b>Extended Pedigree</b> | <b>Mixed Family Types</b> |
|---------------------------------------------------------------------------------------|----------------------------|--------------------------|--------------------------|---------------------------|
| <i>RareIBD</i>                                                                        | 0.064                      | 0.033                    | 0.465                    | 0.094                     |
| <b>Each Founder has a probability of 50% to be missing all of their genotype data</b> |                            |                          |                          |                           |
| <i>RareIBD</i>                                                                        | 0.064                      | 0.046                    | 0.296                    | 0.091                     |
| <b>80% African and 20% European population admixture</b>                              |                            |                          |                          |                           |
| <i>RareIBD</i>                                                                        | 0.059                      | 0.028                    | 0.395                    | 0.086                     |
| <b>50% African and 50% European families</b>                                          |                            |                          |                          |                           |
| <i>RareIBD</i>                                                                        | 0.063                      | 0.030                    | 0.476                    | 0.089                     |

One-thousand families for each pedigree structure shown in Figure 1 and mixed pedigree structures were simulated. Genotype data were generated for all autosomal genes across the genome with an OR = 1.0, and type I error rate was defined as the proportion of genes with a p-value less than 0.05. Variant information for 17,987 autosomal genes from ExAC Non-Finnish European were used to generate family data when each founder has a probability (0% or 50%) to be missing their genotype data. Variant information for 17,873 autosomal genes that are present in both ExAC Non-Finnish European and African/African American populations was used to generate family data with population admixture and substructure.

**Table S2. The Ethnicities of Alzheimer's disease families included in the analysis**

| Ethnicity        | Number of Families | Family IDs                                                                                                                                                                                                                                                                                                                                                                                                                   |
|------------------|--------------------|------------------------------------------------------------------------------------------------------------------------------------------------------------------------------------------------------------------------------------------------------------------------------------------------------------------------------------------------------------------------------------------------------------------------------|
| Dominican        | 46                 | CU0002F, CU0003F, CU0004F, CU0005F, CU0007F, CU0008F, CU0010F, CU0013F, CU0014F, CU0015F, CU0016F, CU0017F, CU0021F, CU0023F, CU0026F, CU0029F, CU0030F, CU0031F, CU0033F, CU0035F, CU0037F, CU0039F, CU0043F, CU0044F, CU0045F, CU0046F, CU0047F, CU0048F, CU0049F, CU0050F, CU0052F, CU0053F, CU0057F, CU0058F, CU0060F, CU0064F, CU0065F, CU0067F, CU0068F, CU0071F, CU0073F, CU0076F, CU0078F, CU0081F, CU0082F, CU0083F |
| European Descent | 31                 | LD0179F, LD0223F, LD0232F, LD0241F, LD0254F, LD0307F, LD0856F, LD0949F, LD1223F, LD1260F, LD1265F, LD1315F, LD1329F, LD1579F, NC0049F, NC0131F, NC0205F, NC0302F, UM0002F, UM0147F, UM0152F, UM0196F, UM0304F, UM0458F, UM0463F, UP0001F, UP0002F, UP0004F, UP0005F, UP0008F, UP0009F                                                                                                                                        |
| Puerto Rican     | 2                  | CU0032F, CU0042F                                                                                                                                                                                                                                                                                                                                                                                                             |
| African American | 1                  | LD0941F                                                                                                                                                                                                                                                                                                                                                                                                                      |
| Dutch Isolate    | 1                  | 201                                                                                                                                                                                                                                                                                                                                                                                                                          |

**Table S3. Bioinformatic evaluation and frequencies of analyzed rare variants within *MARCH10***

|                                                                           |                 |                   |              |              |              |                   |                 |                        |
|---------------------------------------------------------------------------|-----------------|-------------------|--------------|--------------|--------------|-------------------|-----------------|------------------------|
| <b>dbSNP rsID</b>                                                         | rs146326363*    | rs116835087**     | rs147046907* | rs60472825   | rs138015683  | rs374880698**     | rs141415486*    | rs78457484             |
| <b>hg19 Position</b>                                                      | 17:60782924     | 17:60813470       | 17:60813550  | 17:60813944  | 17:60813982  | 17:60814417       | 17:60837208     | 17:60837337            |
| <b>Reference allele</b>                                                   | G               | C                 | G            | G            | T            | A                 | C               | G                      |
| <b>Alternate allele</b>                                                   | C               | T                 | A            | A            | C            | C                 | T               | A                      |
| <b>cDNA change</b>                                                        | c.2347C>G       | c.1759G>A         | c.1679C>T    | c.1285C>T    | c.1247A>G    | c.812T>G          | c.370G>A        | c.241C>T               |
| <b>Amino acid change</b>                                                  | p.Gln783Glu     | p.Gly587Ser       | p.Thr560Ile  | p.His429Tyr  | p.Asn416Ser  | p.Phe271Cys       | p.Glu124Lys     | p.Pro81Ser             |
| <b>ExAC all MAF</b>                                                       | 0.0005          | 0.0037            | 0.0068       | 0.0056       | 0.0010       | 1.63E-05          | 0.0011          | 0.0072                 |
| <b>Number of alternative alleles - AD pedigree members (n=316)</b>        | 2               | 4                 | 10           | 19           | 1            | 3                 | 1               | 13                     |
| <b>Number of alternative alleles - unaffected pedigree members (n=98)</b> | 1               | 0                 | 0            | 4            | 1            | 0                 | 0               | 0                      |
| <b>GERP score</b>                                                         | 4.24            | 4.4               | 3.32         | 3            | -0.978       | 2.61              | 4.79            | 0.166                  |
| <b>PhyloP score</b>                                                       | 2.254           | 1.601             | 1.565        | 0.095        | -0.474       | 1.492             | 2.695           | 0.711                  |
| <b>CADD score, scaled</b>                                                 | 19.6            | 22.4              | 6.022        | 12.46        | 4.402        | 22.4              | 15.74           | 9.87                   |
| <b>FATHMM</b>                                                             | tolerated       | tolerated         | tolerated    | tolerated    | tolerated    | tolerated         | tolerated       | tolerated              |
| <b>MutationTaster</b>                                                     | disease-causing | disease-causing   | polymorphism | polymorphism | polymorphism | disease-causing   | disease-causing | polymorphism automatic |
| <b>Polyphen-2 HVAR</b>                                                    | benign          | possibly damaging | benign       | benign       | Benign       | probably damaging | benign          | possibly damaging      |
| <b>PROVEAN</b>                                                            | neutral         | neutral           | neutral      | neutral      | neutral      | deleterious       | neutral         | neutral                |
| <b>SIFT</b>                                                               | tolerated       | damaging          | tolerated    | damaging     | tolerated    | damaging          | tolerated       | damaging               |

Abbreviations are as follows: ExAC, Exome Aggregation Consortium; MAF, minor allele frequency; CADD, Combined Annotation Dependent Depletion; FATHMM, Functional Analysis through Hidden Markov Models; PROVEAN, Protein Variation Effect Analyzer; SIFT, Sorting Intolerant From Tolerant. Conservation scores and bioinformatics results as compiled by dbNSFP v.2.9.

\*Variant is deemed as conserved nucleotide (both GERP and PhyloP scores > 1).

^Variant is deemed damaging by at least three of six bioinformatics tools (variant with CADD scaled score >15 is deemed to be deleterious).

**Table S4. Bioinformatic Evaluation and Frequencies of Rare Missense Variants within *AMBN***

| dbSNP rsID                                                                | rs143940501**^    | rs146167261**^    | rs115723025  | rs113506649  | rs139319140**^    | rs150017698**^    | NA           | rs76503327   |
|---------------------------------------------------------------------------|-------------------|-------------------|--------------|--------------|-------------------|-------------------|--------------|--------------|
| <b>hg19 Position</b>                                                      | 4:71469167        | 4:71471905        | 4:71471958   | 4:71471985   | 4:71472001        | 4:71472053        | 4:71472146   | 4:71472235   |
| <b>Reference allele</b>                                                   | C                 | G                 | G            | C            | G                 | A                 | C            | G            |
| <b>Alternate allele</b>                                                   | T                 | A                 | A            | A            | A                 | C                 | T            | A            |
| <b>cDNA change</b>                                                        | c.743C>T          | c.802G>A          | c.855G>A     | c.882C>A     | c.898G>A          | c.950A>C          | c.1043C>T    | c.1132G>A    |
| <b>Amino acid change</b>                                                  | p.Ala248Val       | p.Gly268Arg       | p.Met285Ile  | p.His294Gln  | p.Gly300Ser       | p.Glu317Ala       | p.Ala348Val  | p.Val378Ile  |
| <b>ExAC all MAF</b>                                                       | 0.0007            | 0.0026            | 0.0103       | 0.0053       | 0.0004            | 0.0004            | NA           | 0.0068       |
| <b>Number of alternative alleles - AD pedigree members (n=316)</b>        | 2                 | 4                 | 14           | 4            | 1                 | 0                 | 3            | 13           |
| <b>Number of alternative alleles - unaffected pedigree members (n=98)</b> | 0                 | 0                 | 1            | 0            | 0                 | 1                 | 0            | 2            |
| <b>GERP score</b>                                                         | 5.07              | 5.79              | 2.73         | -1.87        | 4.95              | 4.66              | 1.98         | 4.07         |
| <b>PhyloP score</b>                                                       | 2.394             | 3.499             | 0.453        | -1.137       | 2.596             | 3.297             | 0.204        | 0.908        |
| <b>CADD score, scaled</b>                                                 | 24.6              | 26.3              | 10.97        | 0.023        | 26.1              | 19.31             | 0.002        | 10.97        |
| <b>FATHMM</b>                                                             | tolerated         | tolerated         | tolerated    | tolerated    | tolerated         | tolerated         | tolerated    | tolerated    |
| <b>MutationTaster</b>                                                     | disease-causing   | disease-causing   | polymorphism | polymorphism | disease-causing   | disease-causing   | polymorphism | polymorphism |
| <b>Polyphen-2 HVAR</b>                                                    | possibly damaging | probably damaging | benign       | benign       | probably damaging | probably damaging | benign       | benign       |
| <b>PROVEAN</b>                                                            | neutral           | deleterious       | neutral      | neutral      | deleterious       | deleterious       | neutral      | neutral      |
| <b>SIFT</b>                                                               | damaging          | damaging          | damaging     | tolerated    | damaging          | tolerated         | tolerated    | tolerated    |

Abbreviations are as follows: NA, Not Available; ExAC, Exome Aggregation Consortium; MAF, minor allele frequency; CADD, Combined Annotation Dependent Depletion; FATHMM, Functional Analysis through Hidden Markov Models; PROVEAN, Protein Variation Effect Analyzer; SIFT, Sorting Intolerant From Tolerant. Conservation scores and bioinformatics results as compiled by dbNSFP v.2.9.

\*\*Variant is deemed as conserved nucleotide (both GERP and PhyloP scores > 1).

^Variant is deemed damaging by at least three of six bioinformatics tools (variant with CADD scaled score >15 is deemed to be deleterious).



**Table S5. Bioinformatic Evaluation and Frequencies of Rare Missense Variants within *TCOF1***

| dbSNP rsID                                                                | rs56180593 <sup>^</sup> | rs142477153 <sup>**</sup> | rs181203524       | rs144327167 <sup>**</sup> | rs189476787 <sup>^</sup> | rs75181211 <sup>^</sup> | rs114326915  | rs201458471  | rs75583421 <sup>^</sup> |
|---------------------------------------------------------------------------|-------------------------|---------------------------|-------------------|---------------------------|--------------------------|-------------------------|--------------|--------------|-------------------------|
| <b>hg19 Position</b>                                                      | 5:149740732             | 5:149747428               | 5:149748403       | 5:149753894               | 5:149754226              | 5:149754229             | 5:149754325  | 5:149754948  | 5:149755362             |
| <b>Reference allele</b>                                                   | C                       | A                         | C                 | G                         | C                        | C                       | C            | T            | G                       |
| <b>Alternate allele</b>                                                   | T                       | G                         | T                 | A                         | T                        | T                       | T            | C            | A                       |
| <b>cDNA change</b>                                                        | c.122C>T                | c.326A>G                  | c.503C>T          | c.797G>A                  | c.899C>T                 | c.902C>T                | c.998C>T     | c.1304T>C    | c.1552G>A               |
| <b>Amino acid change</b>                                                  | p.Ala41Val              | p.Asn109Ser               | p.Thr168Met       | p.Ser266Asn               | p.Pro300Leu              | p.Ala301Val             | p.Ser333Leu  | p.Met435Thr  | p.Val518Ile             |
| <b>ExAC all MAF</b>                                                       | 0.0023                  | 0.0001                    | 0.0004            | 0.0034                    | 0.0002                   | 0.0035                  | 0.0038       | 0.0001       | 0.0077                  |
| <b>Number of alternative alleles - AD pedigree members (n=316)</b>        | 4                       | 1                         | 7                 | 2                         | 3                        | 13                      | 2            | 3            | 6                       |
| <b>Number of alternative alleles - unaffected pedigree members (n=98)</b> | 0                       | 0                         | 0                 | 0                         | 0                        | 2                       | 1            | 1            | 1                       |
| <b>GERP score</b>                                                         | 2.98                    | 4.33                      | -1.6              | 2.98                      | 1.5                      | 2.63                    | -0.0656      | 1.02         | 1.02                    |
| <b>PhyloP score</b>                                                       | 0.602                   | 2.068                     | -0.037            | 4.082                     | 0.661                    | 0.386                   | 1.055        | -0.049       | 0.48                    |
| <b>CADD score, scaled</b>                                                 | 22.3                    | 23.2                      | 7.967             | 22.9                      | 12.91                    | 16.34                   | 6.996        | 0.009        | 18.7                    |
| <b>FATHMM</b>                                                             | damaging                | damaging                  | tolerated         | tolerated                 | tolerated                | tolerated               | tolerated    | tolerated    | tolerated               |
| <b>MutationTaster</b>                                                     | polymorphism            | polymorphism              | polymorphism      | polymorphism              | polymorphism             | polymorphism            | polymorphism | polymorphism | polymorphism            |
| <b>Polyphen-2 HVAR</b>                                                    | benign                  | probably damaging         | probably damaging | probably damaging         | probably damaging        | benign                  | benign       | benign       | possibly damaging       |
| <b>PROVEAN</b>                                                            | neutral                 | deleterious               | neutral           | neutral                   | deleterious              | deleterious             | deleterious  | neutral      | neutral                 |
| <b>SIFT</b>                                                               | damaging                | damaging                  | damaging          | damaging                  | damaging                 | damaging                | damaging     | tolerated    | damaging                |

Abbreviations are as follows: NA, Not Available; ExAC, Exome Aggregation Consortium; MAF, minor allele frequency; CADD, Combined Annotation Dependent Depletion; FATHMM, Functional Analysis through Hidden Markov Models; PROVEAN, Protein Variation Effect Analyzer; SIFT, Sorting Intolerant From Tolerant. Conservation scores and bioinformatics results as compiled by dbNSFP v.2.9.

<sup>\*</sup>Variant is deemed as conserved nucleotide (both GERP and PhyloP scores > 1).

<sup>^</sup>Variant is deemed damaging by at least three of six bioinformatics tools (variant with CADD scaled score >15 is deemed to be deleterious).



**Table S6. Bioinformatic Evaluation and Frequencies of Rare Missense Variants within *AXIN1***

| dbSNP rsID                                                                | rs34015754*       | rs117208012* | rs367788267* | rs141148118  | rs149849071  | rs146947903* | rs116350678* | rs140151215*    |
|---------------------------------------------------------------------------|-------------------|--------------|--------------|--------------|--------------|--------------|--------------|-----------------|
| <b>hg19 Position</b>                                                      | 16:338189         | 16:347063    | 16:347143    | 16:347930    | 16:347957    | 16:348021    | 16:348233    | 16:396221       |
| <b>Reference allele</b>                                                   | C                 | C            | G            | C            | C            | G            | C            | G               |
| <b>Alternate allele</b>                                                   | T                 | T            | A            | T            | T            | C            | T            | C               |
| <b>cDNA change</b>                                                        | c.2522G>A         | c.1948G>A    | c.1868C>T    | c.1576G>A    | c.1549G>A    | c.1485C>G    | c.1273G>A    | c.805C>G        |
| <b>Amino acid change</b>                                                  | p.Arg841Gln       | p.Gly650Ser  | p.Ser623Leu  | p.Ala526Thr  | p.Val517Ile  | p.Asp495Glu  | p.Gly425Ser  | p.Gln269Glu     |
| <b>ExAC all MAF</b>                                                       | 0.0085            | 0.0168       | 0.0004       | 0.0007       | 0.0016       | 0.0098       | 0.0075       | 0.0009          |
| <b>Number of alternative alleles - AD pedigree members (n=316)</b>        | 2                 | 3            | 1            | 3            | 1            | 2            | 19           | 3               |
| <b>Number of alternative alleles - unaffected pedigree members (n=98)</b> | 0                 | 0            | 0            | 0            | 0            | 0            | 1            | 0               |
| <b>GERP score</b>                                                         | 4.43              | 2.63         | 4.98         | -5.51        | -10.1        | 3.79         | 3.31         | 5.1             |
| <b>PhyloP score</b>                                                       | 4.824             | 1.19         | 2.46         | -1.489       | -2.359       | 1.208        | 2.732        | 7.611           |
| <b>CADD score, scaled</b>                                                 | 13.68             | 8.312        | 16.57        | 0.018        | 0.001        | 10.82        | 13.84        | 23.6            |
| <b>FATHMM</b>                                                             | tolerated         | tolerated    | tolerated    | tolerated    | tolerated    | tolerated    | tolerated    | tolerated       |
| <b>MutationTaster</b>                                                     | disease-causing   | polymorphism | polymorphism | polymorphism | polymorphism | polymorphism | polymorphism | disease-causing |
| <b>Polyphen-2 HVAR</b>                                                    | possibly damaging | benign          |
| <b>PROVEAN</b>                                                            | neutral           | neutral      | neutral      | neutral      | neutral      | neutral      | neutral      | neutral         |
| <b>SIFT</b>                                                               | tolerated         | tolerated    | tolerated    | tolerated    | tolerated    | tolerated    | tolerated    | tolerated       |

Abbreviations are as follows: ExAC, Exome Aggregation Consortium; MAF, minor allele frequency; CADD, Combined Annotation Dependent Depletion; FATHMM, Functional Analysis through Hidden Markov Models; PROVEAN, Protein Variation Effect Analyzer; SIFT, Sorting Intolerant From Tolerant. Conservation scores and bioinformatics results as compiled by dbNSFP v.2.9.

\*Variant is deemed as conserved nucleotide (both GERP and PhyloP scores > 1).

**Table S7. Bioinformatic Evaluation and Frequencies of Rare Missense Variants within *TNK1***

| dbSNP rsID                                                         | rs201180891**     | rs61730812**      | NA**              | rs56093628^       | rs80015268*  | rs141588799  |
|--------------------------------------------------------------------|-------------------|-------------------|-------------------|-------------------|--------------|--------------|
| hg19 Position                                                      | 17:7286889        | 17:7287832        | 17:7287859        | 17:7291869        | 17:7291943   | 17:7292117   |
| Reference allele                                                   | T                 | C                 | T                 | C                 | G            | G            |
| Alternate allele                                                   | G                 | A                 | A                 | G                 | C            | A            |
| cDNA change                                                        | c.380T>G          | c.896C>A          | c.923T>A          | c.1637C>G         | c.1711G>C    | c.1802G>A    |
| Amino acid change                                                  | p.Phe127Cys       | p.Ala299Asp       | p.Met308Lys       | p.Ser546Cys       | p.Gly571Arg  | p.Ser601Asn  |
| ExAC all MAF                                                       | 3.42E-05          | 0.0114            | NA                | 0.0022            | 0.0027       | 0.0005       |
| Number of alternative alleles - AD pedigree members (n=316)        | 4                 | 8                 | 2                 | 4                 | 1            | 2            |
| Number of alternative alleles - unaffected pedigree members (n=98) | 0                 | 0                 | 0                 | 0                 | 0            | 0            |
| GERP score                                                         | 1.99              | 4.03              | 5.3               | 4.18              | 3.27         | 1.89         |
| PhyloP score                                                       | 5.177             | 2.355             | 6.029             | 0.375             | 3.52         | 0.736        |
| CADD score, scaled                                                 | 26.2              | 22.1              | 22.1              | 20.4              | 9.985        | 5.874        |
| FATHMM                                                             | damaging          | damaging          | tolerated         | tolerated         | tolerated    | tolerated    |
| MutationTaster                                                     | disease-causing   | disease-causing   | disease-causing   | polymorphism      | polymorphism | polymorphism |
| Polyphen-2 HVAR                                                    | probably damaging | possibly damaging | probably damaging | possibly damaging | benign       | benign       |
| PROVEAN                                                            | deleterious       | neutral           | deleterious       | neutral           | neutral      | neutral      |
| SIFT                                                               | damaging          | tolerated         | damaging          | damaging          | damaging     | damaging     |

Abbreviations are as follows: NA, Not Available; ExAC, Exome Aggregation Consortium; MAF, minor allele frequency; CADD, Combined Annotation Dependent Depletion; FATHMM, Functional Analysis through Hidden Markov Models; PROVEAN, Protein Variation Effect Analyzer; SIFT, Sorting Intolerant From Tolerant. Conservation scores and bioinformatics results as compiled by dbNSFP v.2.9.

\*Variant is deemed as conserved nucleotide (both GERP and PhyloP scores > 1).

^Variant is deemed damaging by at least three of six bioinformatics tools (variant with CADD scaled score >15 is deemed to be deleterious).
